# Supplementary material
Source: PubMed Central journal article supplement (PMC2666006)
Supplement: NIHMS98075-supplement-02.pdf [file NIHMS98075-supplement-02.pdf]

## Supplementary Figure 2

### METHYLATION SPECIFIC PRIMERS

#### **Meg3** [20]

Meg3(PAGE)MF 5' - GTT AGT AAT CGG GTT TGT CGG C - 3'

Meg3(PAGE)MR 5' - AAT CAT AAC TCC GAA CAC CCG CG - 3'

Meg3(PAGE)UF 5' - GAG GAT GGT TAG TTA TTG GGG T - 3'

Meg3(PAGE)UR 5' - CCA CCA TAA CCA ACA CCC TAT AAT CAC A - 3'

#### **SNRPN** [48]

SNRPN MF 5' -TAA ATA AGT ACG TTT GCG CGG TC -3'

SNRPN MR 5' - AAC CTT ACC CGC TCC ATC GCG -3'

SNRPN UF 5' - GTA GGT TGG TGT GTA TGT TTA GGT -3'

SNRPN UR 5' - ACA TCA AAC ATC TCC AAC AAC CA -3'

### BISULFITE SEQUENCING

NOEY BS- FW 5' - AGG TGA GAA AAA GTT TAT AGT TTA ATA GTT - 3'

NOEY BS-RV 5' - AAC ACT TAT TAT TTT CAA ATA CCC CTA AA - 3'

387bp

94°C-30s, 49.8°C-40s (39X), 72°C-45s, 72°C-10m

Meg3 SQF1 5' - GAT TTT TTT TAT ATA TTG TGT TTG - 3'

Meg3 SQR 5' - CTC ATT TCT CTA AAA ATA ATT AAC C - 3'

220bp

94°C-30s, 55°C-30s (39X), 72°C-30s, 72°C-10m

3mM MgCl<sub>2</sub> 0.2mM dNTP, 0.4uM Primer [20]

SNRPN BS-FW 5' - TTT TTT TAT TGT AAT AGT GTT GTG GG - 3'

SNRPN BS-RV 5' - AAC AAA AAA CTT TAA AAC CCA AAT T - 3'

399bp

94°C -30s, 47.5°C-40s (34X), 72°C-45s, 72°C-10m

L3mbtl CpG3-M5 FW - 5' - AAG AGT ATT TTT GTA TTT GTT TAA GT - 3'

L3mbtl CpG3-M6 RV - 5' - AAC CTA AAA ATA CTT CAA CTC AA - 3'

569BP

94°C-30s, 50°C-30s (35X), 72°C-1.3m, 72°C-10m [49]

**Supplementary Figure 2, continued:**

SEQUENOM PRIMERS

94°C-30s, 62°C/64°C-30s (44X), 72°C-1m, 72°C-3m

SNM-Noey2 fwd 5' - AGG AAG AGA GAT TTT AAT AGG TGA GAA AAA GTT TA - 3'  
SNM-Noey2 rev 5' - CAG TAA TAC GAC TCA CTA TAG GGA GAA GGC TAA CAC TTA  
TTA TTT TCA AAT ACC CC - 3'

SNM-Meg3 fwd 5' - AGG AAG AGA GTT TTG GTT TAT ATT TGG GAA TTA G - 3' SNM-  
Meg3 rev 5' - CAG TAA TAC GAC TCA CTA TAG GGA GAA GGC TTC ATT TCT CTA  
AAA ATA ATT AAC C - 3'

SNM-SNRPN fwd 5' - AGG AAG AGA GTT TTT TTA TTG TAA TAG TGT TGT GGG - 3'  
SNM-SNRPN rev 5' - CAG TAA TAC GAC TCA CTA TAG GGA GAA GGC TAA CAA AAA  
ACT TTA AAA CCC AAA TT - 3'

SQN-Golf Fwd 5' - AGG AAG AGA GTT GGA GGT AAA GAT AGG AGG T - 3'  
SQN-Golf Rev 5' - CAG TAA TAC GAC TCA CTA TAG GGA GAA GGC TCC CTC CCT  
AAT CTA AAA TCC - 3'

SQN-XLGolf Fwd 5' - AGG AAG AGA GGA TTT TGT TTT TTY GGG G - 3'  
SQN-XLGolf Rev 5' - CAG TAA TAC GAC TCA CTA TAG GGA GAA GGC TAT  
TCA AAA ACC CCT CCC - 3'

SNM- L3MBTL fwd 5' - AGG AAG AGA GTT GGA TGT GTT TTG TTT TTT T - 3'  
SNM- L3MBTL rev 5' - CAG TAA TAC GAC TCA CTA TAG GGA GAA GGC TAA CCC  
ACC CCT AAA ACC C - 3'
